# Supplementary material for: Selection on non-antigenic gene segments of seasonal influenza A virus and its impact on adaptive evolution
Source: PubMed Central journal article supplement (PMC5724400; doi:10.1093/ve/vex034), 2017-11-09
Supplement: vex034_supp_figure_s1.pdf [file vex034_supp_figure_s1.pdf]

**HA**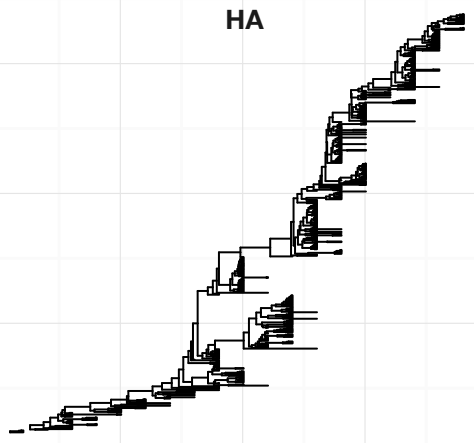**PB2**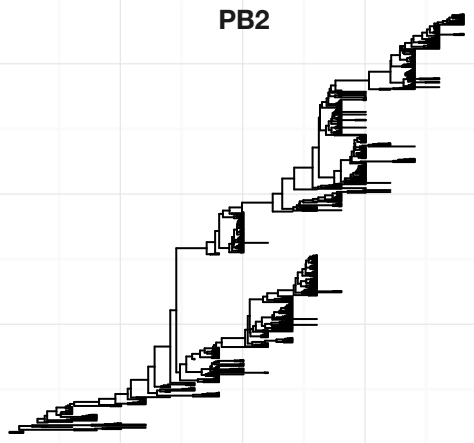**PB1**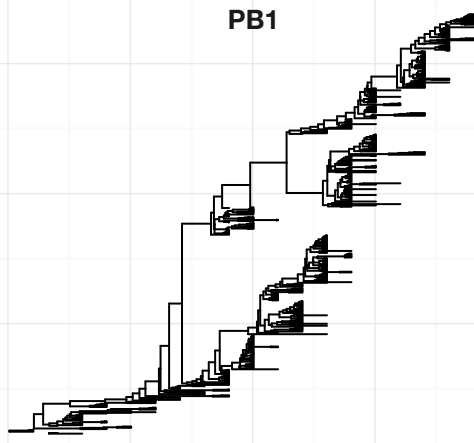**PA**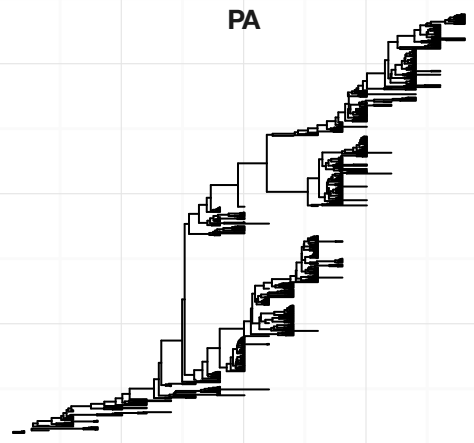**NA**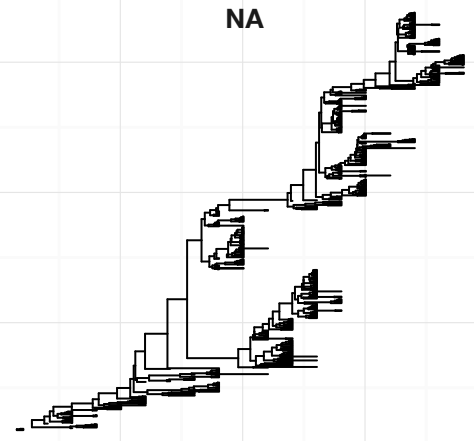**NP**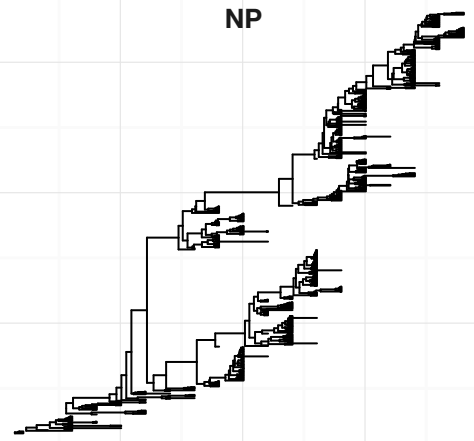**M1**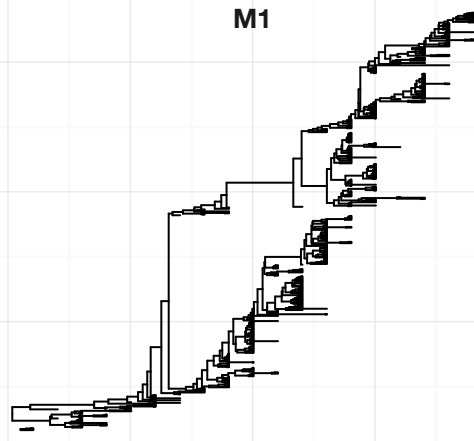**NS**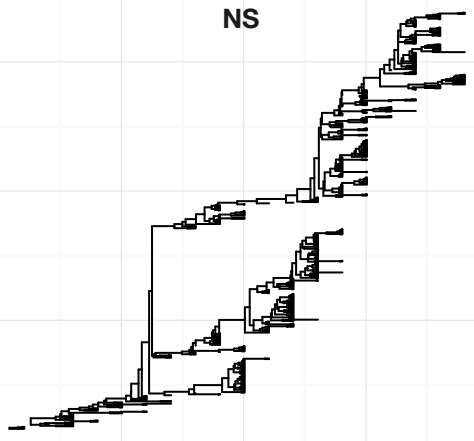

Time (years)
