# Supplementary material for: Selection on non-antigenic gene segments of seasonal influenza A virus and its impact on adaptive evolution
Source: PubMed Central journal article supplement (PMC5724400; doi:10.1093/ve/vex034), 2017-11-09
Supplement: vex034_supp_figure_s2.pdf [file vex034_supp_figure_s2.pdf]

Selection on only the antigenic  
gene segment

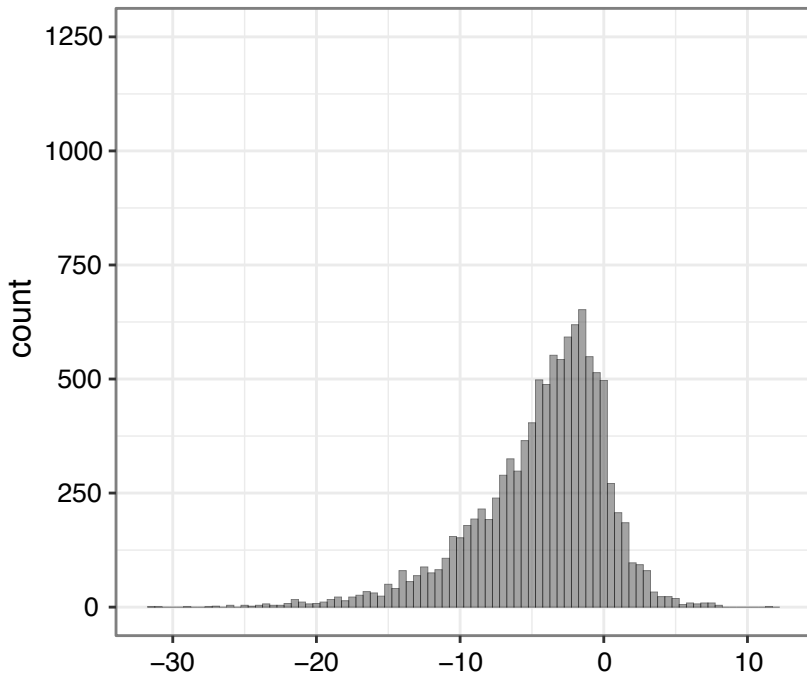

Selection on both gene  
segments

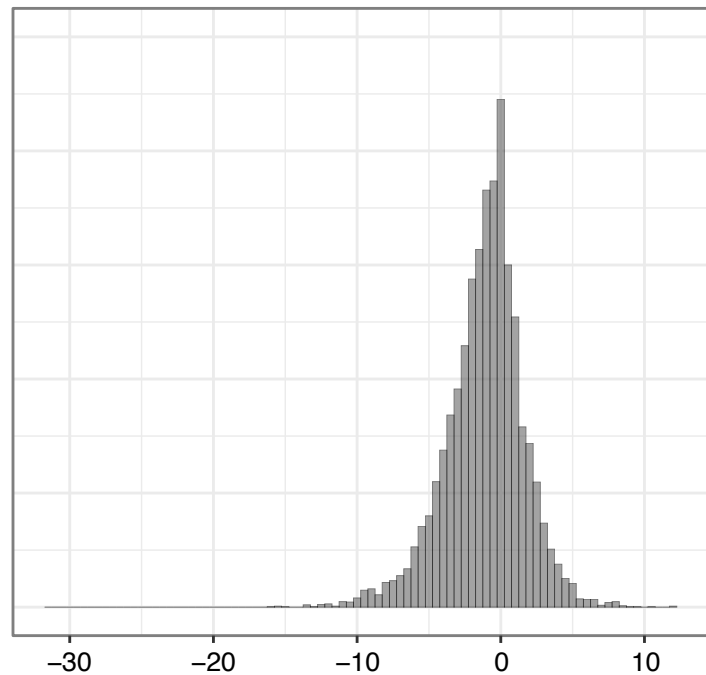

Difference in TMRCA (years)
