# Supplementary material for: Selection on non-antigenic gene segments of seasonal influenza A virus and its impact on adaptive evolution
Source: PubMed Central journal article supplement (PMC5724400; doi:10.1093/ve/vex034), 2017-11-09

$N = 1000$  $N = 5000$  $N = 10000$ 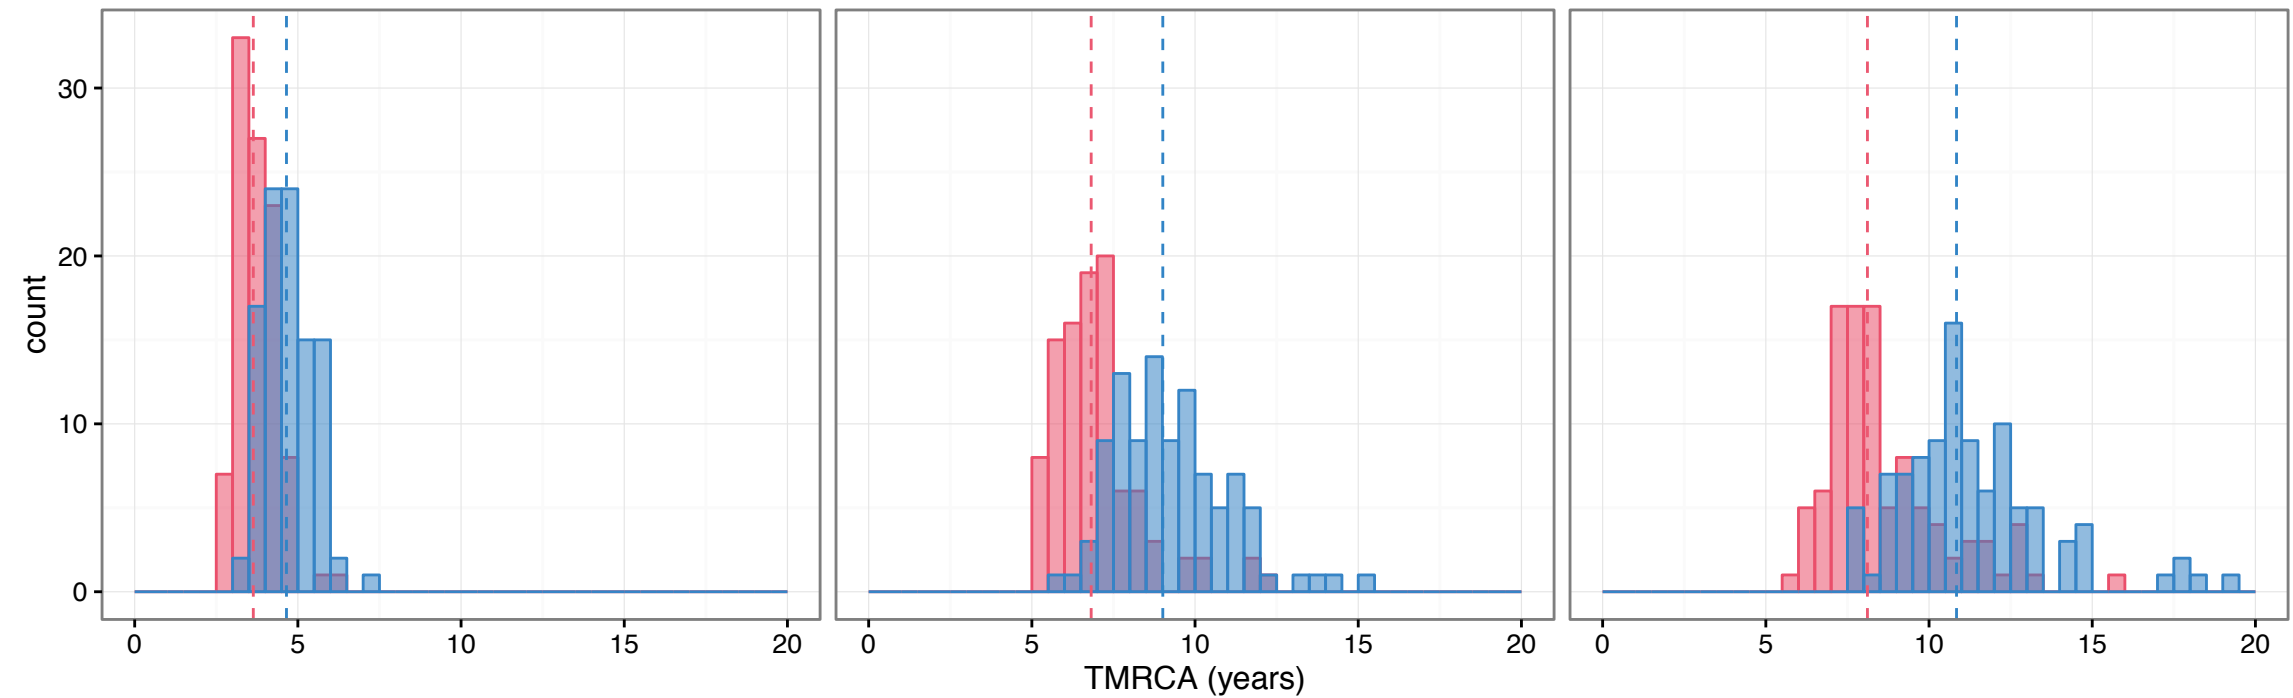

Supplement: vex034_supp_figure_s5.pdf [file vex034_supp_figure_s5.pdf]
