# Supplementary material for: Selection on non-antigenic gene segments of seasonal influenza A virus and its impact on adaptive evolution
Source: PubMed Central journal article supplement (PMC5724400; doi:10.1093/ve/vex034), 2017-11-09

increasing coinfection rate

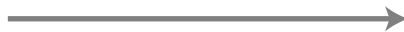

$\beta = 0.0025$

$\beta = 0.0125$

$\beta = 0.25$

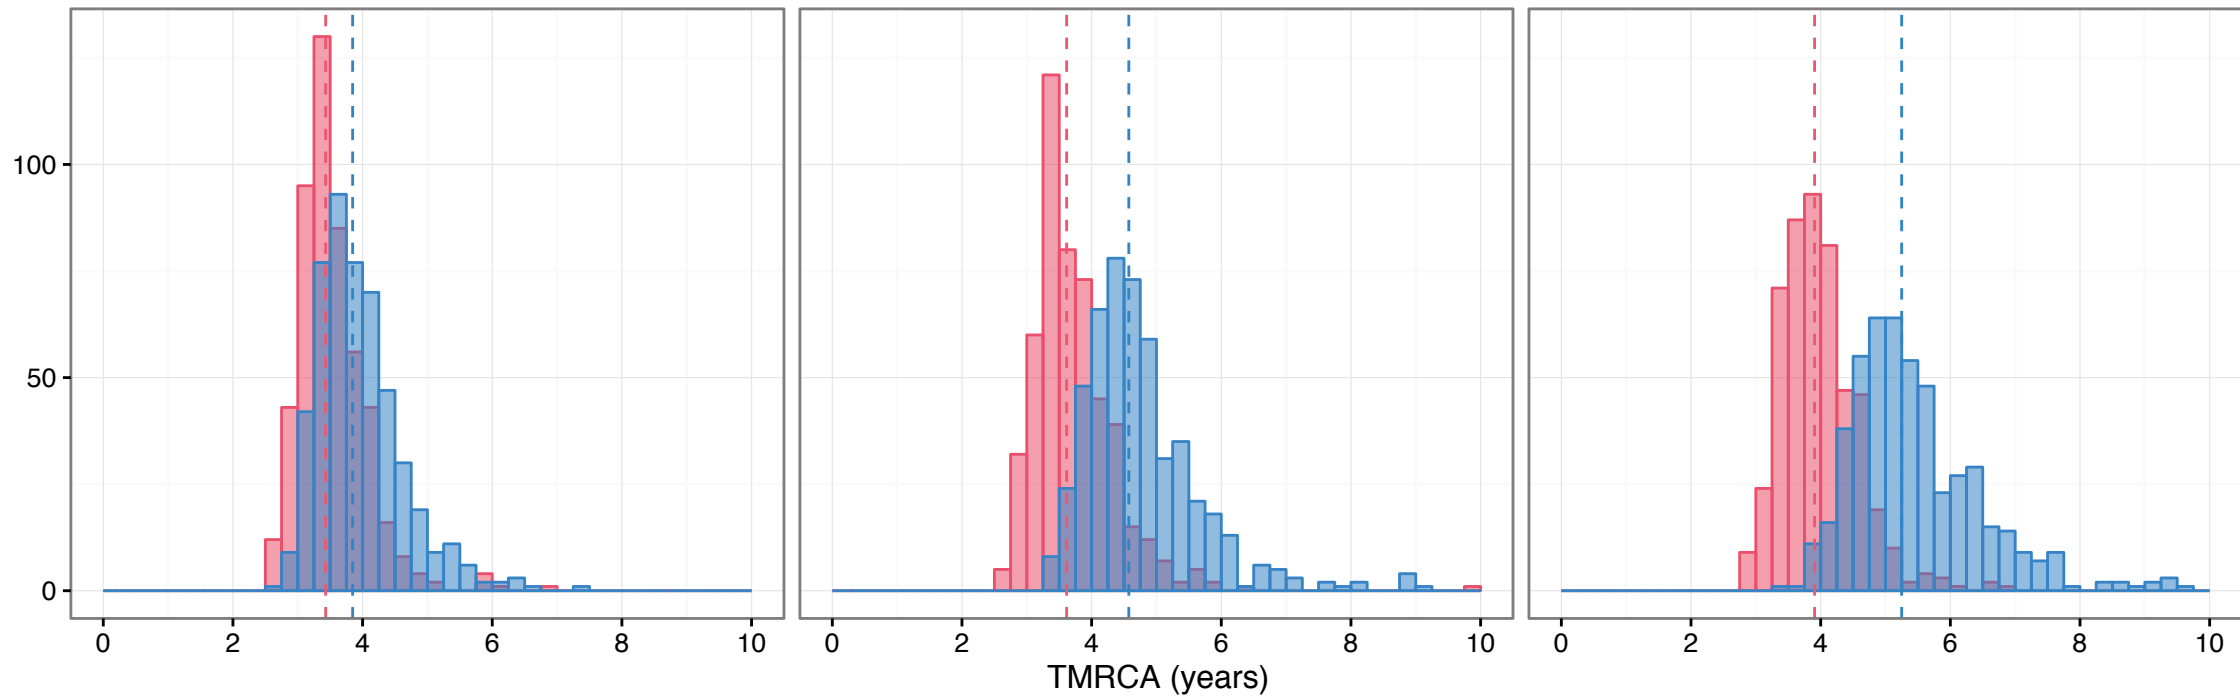

Supplement: vex034_supp_figure_s7.pdf [file vex034_supp_figure_s7.pdf]
