# Supplementary material for: Selection on non-antigenic gene segments of seasonal influenza A virus and its impact on adaptive evolution
Source: PubMed Central journal article supplement (PMC5724400; doi:10.1093/ve/vex034), 2017-11-09

**A** Whole Virus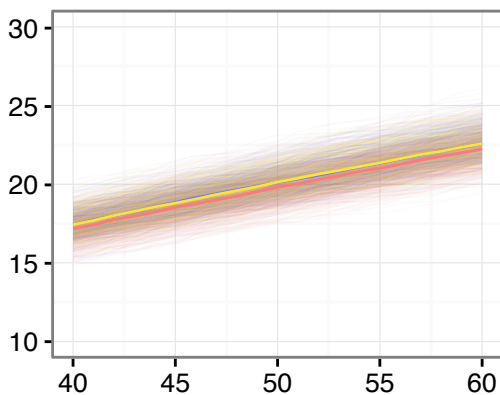**B** Antigenic Segment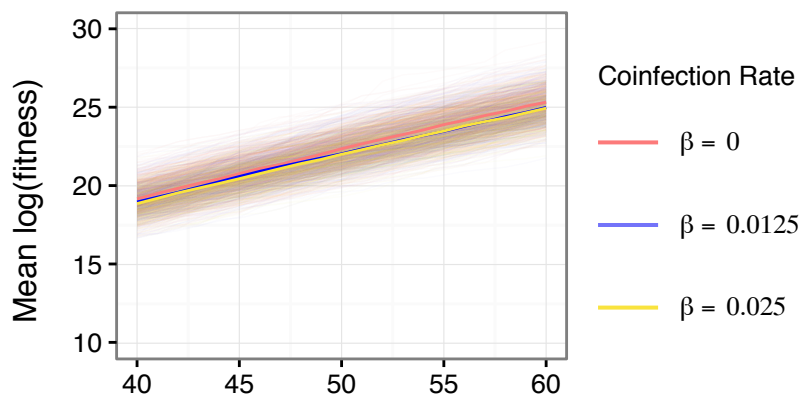**C** Non-antigenic Segment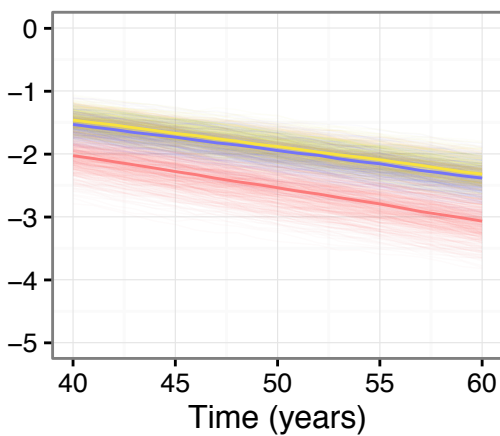

Supplement: vex034_supp_figure_s9.pdf [file vex034_supp_figure_s9.pdf]
